# Supplementary material for: Influence of a portable air treatment unit on health-related quality indicators of indoor air in a classroom
Source: Royal Society of Chemistry journal article supplement (doi:10.1039/c1em10559k), 2011-10-25
Supplement: c1em10559k.pdf [file c1em10559k.pdf]

# Influence of a portable air treatment unit on health-related quality indicators of indoor air in a classroom

Paul T.J. Scheepers\*, Robbert Cremers, Stef P.R. van Hout, Rob B.M. Anzion, Research Laboratory  
Molecular Epidemiology, Department of Epidemiology, Biostatistics and HTA, Radboud University  
Nijmegen Medical Centre, Nijmegen, The Netherlands

Table S1 shows the technical specifications of the portable air treatment unit (PATU) that was studied in a class room.

Table S1: Technical specifications of the PATU (Source: Nikken®, Irvine, California, USA).

|                                             |                                                                                  |
|---------------------------------------------|----------------------------------------------------------------------------------|
| Type                                        | Air Wellness™ Power5 Pro™                                                        |
| Technology                                  | Filtration, absorption and ionisation (negative ions)                            |
| Filters                                     | Woven pre-filter (32 x 32 yarns/inch)                                            |
|                                             | Antibacterial/antiviral filter                                                   |
|                                             | Activated coal (Ø 3.0 mm with specific surface of 1 100 ± 200 m <sup>2</sup> /g) |
|                                             | High efficiency (‘HEPA’) filter                                                  |
| Range                                       | 36 m <sup>2</sup>                                                                |
| Capacity                                    | Stand by setting: 0.9 m <sup>3</sup> /min                                        |
|                                             | Setting 1: 1.6 m <sup>3</sup> /min                                               |
|                                             | Setting 2: 2.5 m <sup>3</sup> /min)                                              |
|                                             | Setting 3: 3.3 m <sup>3</sup> /min                                               |
|                                             | Setting 4: 3.9 m <sup>3</sup> /min                                               |
|                                             | Turbo setting: 5.6 m <sup>3</sup> /min                                           |
| Clean air delivery rate (CADR) <sup>a</sup> | 198.92 cfm (338 m <sup>3</sup> /h) at highest (Turbo) setting                    |
| O <sub>3</sub> emission                     | < 0.001 ppm                                                                      |
| Noise production                            | 47 dB (maximum noise production at highest ‘Turbo’ Setting)                      |
| Electricity useage                          | 9 Watt (Setting 2)                                                               |

|                           |                                                                          |
|---------------------------|--------------------------------------------------------------------------|
| Dimensions                | 34 x 59 x 23 cm                                                          |
| Weight                    | 6.8 kg                                                                   |
| Materials using (housing) | Polyurethane, polypropylene, acrylamide butadiene styrene (ABS) polymer  |
| Maintenance               | Every 6 months (cleaning of pre-filter and sieve, replace other filters) |

---

<sup>a</sup> CADR is a measure of the appliance's ability to reduce smoke, dust, and pollen particles in the 0.10-11 µm size range from the air. In ANSI/AHAM AC-1-2006, CADR is defined as 'the rate of contaminant reduction in the test chamber when the unit is turned on, minus the rate of natural decay when the unit is not running, multiplied by the volume of the test chamber as measured in cubic feet' (see [www.cadr.org](http://www.cadr.org) for details).
